# Supplementary material for: Limited Evidence for Risk Factors for Proarrhythmia and Sudden Cardiac Death in Patients Using Antidepressants: Dutch Consensus on ECG Monitoring
Source: Springer Nature journal article supplement (doi:10.1007/s40264-018-0649-z), 2018-02-26
Supplement: MOESM1 [file 24118118]

## Electronic Supplementary Material

*Simoons and Seldenrijk et al., Drug Safety.*

Full list of all retrieved publications from the literature review. Because evidence was insufficient, additional expert opinion was used to formulate the consensus recommendations.

- [1] Aichhorn W, Whitworth AB, Weiss EM, Hinterhuber H, Marksteiner J. Differences between men and women in side effects of second-generation antipsychotics. *Nervenarzt* 2007;78:45-52.
- [2] Al-Abri SA, Woodburn C, Olson KR, Kearney TE. Ventricular dysrhythmias associated with poisoning and drug overdose: a 10-year review of statewide poison control center data from California. *Am J Cardiovasc Drugs* 2015;15:43-50.
- [3] Alvarez W, Jr, Pickworth KK. Safety of antidepressant drugs in the patient with cardiac disease: a review of the literature. *Pharmacotherapy* 2003;23:754-771.
- [4] Ames D, Camm J, Cook P, Falkai P, Gury C, Hurley R et al. Minimizing the risks associated with QTc prolongation in people with schizophrenia. A consensus statement by the Cardiac Safety in Schizophrenia Group. *Encephale* 2002;28:552-562.
- [5] Astrom-Lilja C, Odeberg JM, Ekman E, Hagg S. Drug-induced torsades de pointes: a review of the Swedish pharmacovigilance database. *Pharmacoepidemiol Drug Saf* 2008;17:587-592.
- [6] Auquier P, Lancon C, Rouillon F, Lader M, Holmes C. Mortality in schizophrenia. *Pharmacoepidemiol Drug Saf* 2006;15:873-879.
- [7] Bailey B, Buckley NA, Amre DK. A meta-analysis of prognostic indicators to predict seizures, arrhythmias or death after tricyclic antidepressant overdose. *J Toxicol Clin Toxicol* 2004;42:877-888.
- [8] Beach SR, Celano CM, Noseworthy PA, Januzzi JL, Huffman JC. QTc prolongation, torsades de pointes, and psychotropic medications. *Psychosomatics* 2013;54:1-13.
- [9] Brewer TL, Collins M. A review of clinical manifestations in adolescent and young adults after use of synthetic cannabinoids. *J Spec Pediatr Nurs* 2014;19:119-126.
- [10] Buckley NA, Faunce TA. 'Atypical' antidepressants in overdose: clinical considerations with respect to safety. *Drug Saf* 2003;26:539-551.
- [11] Bullock R. Treatment of behavioural and psychiatric symptoms in dementia: implications of recent safety warnings. *Curr Med Res Opin* 2005;21:1-10.
- [12] Camm AJ, Karayal ON, Meltzer H, Kolluri S, O'Gorman C, Miceli J et al. Ziprasidone and the corrected QT interval: a comprehensive summary of clinical data. *CNS Drugs* 2012;26:351-365.
- [13] Carreiro SV, Martins RR, De Carvalho A. Psychotropic drugs and sudden death. *Acta Med Port* 2006;19:151-164.
- [14] Castillo Sanchez M, Fabregas Escurriola M, Berge Baquero D, Goday Arno A, Valles Callol JA. Psychosis, cardiovascular risk and associated mortality: are we on the right track? *Clin Investig Arterioscler* 2014;26:23-32.
- [15] Chung AK, Chua SE. Effects on prolongation of Bazett's corrected QT interval of seven second-generation antipsychotics in the treatment of schizophrenia: a meta-analysis. *J Psychopharmacol* 2011;25:646-666.
- [16] Ciranni MA, Kearney TE, Olson KR. Comparing acute toxicity of first- and second-generation antipsychotic drugs: a 10-year, retrospective cohort study. *J Clin Psychiatry* 2009;70:122-129.
- [17] Cubeddu LX. QT prolongation and fatal arrhythmias: a review of clinical implications and effects of drugs. *Am J Ther* 2003;10:452-457.
- [18] de Groot MH, van Campen JP, Moek MA, Tulner LR, Beijnen JH, Lamoth CJ. The effects of fall-risk-increasing drugs on postural control: a literature review. *Drugs Aging* 2013;30:901-920.

- [19] De Hert M, Detraux J, van Winkel R, Yu W, Correll CU. Metabolic and cardiovascular adverse effects associated with antipsychotic drugs. *Nat Rev Endocrinol* 2011;8:114-126.
- [20] De Ponti F, Poluzzi E, Cavalli A, Recanatini M, Montanaro N. Safety of non-antiarrhythmic drugs that prolong the QT interval or induce torsade de pointes: an overview. *Drug Saf* 2002;25:263-286.
- [21] De Ponti F, Poluzzi E, Montanaro N. QT-interval prolongation by non-cardiac drugs: lessons to be learned from recent experience. *Eur J Clin Pharmacol* 2000;56:1-18.
- [22] Del Rosario ME, Weachter R, Flaker GC. Drug-induced QT prolongation and sudden death. *Mo Med* 2010;107:53-58.
- [23] Dorado P, Berecz R, Penas-Lledo EM, Llerena A. Antipsychotic drugs and QTc prolongation: the potential role of CYP2D6 genetic polymorphism. *Expert Opin Drug Metab Toxicol* 2007;3:9-19.
- [24] Fanoë S, Kristensen D, Fink-Jensen A, Jensen HK, Toft E, Nielsen J et al. Risk of arrhythmia induced by psychotropic medications: a proposal for clinical management. *Eur Heart J* 2014;35:1306-1315.
- [25] Fazekas T, Liskai G. Clinical proarrhythmias induced by anti-arrhythmic drugs, non-cardiovascular agents and implantable cardioverter-defibrillators. *Orv Hetil* 2002;143:61-69.
- [26] Fazekas T, Liskai G. Proarrhythmic (torsadogenic) effects of QT-prolonging non-antiarrhythmic drugs. *Orv Hetil* 2005;146:451-460.
- [27] Foulke GE, Albertson TE, Walby WF. Tricyclic antidepressant overdose: emergency department findings as predictors of clinical course. *Am J Emerg Med* 1986;4:496-500.
- [28] Freeman MP, Freeman SA. Lithium: clinical considerations in internal medicine. *Am J Med* 2006;119:478-481.
- [29] Frimas V, Roberge C, Perroux D, Dauvillier JM. Cardiological monitoring of antipsychotic-treated patients: evaluation and evolution of a hospital protocol. *Encephale* 2008;34:467-476.
- [30] Funk KA, Bostwick JR. A comparison of the risk of QT prolongation among SSRIs. *Ann Pharmacother* 2013;47:1330-1341.
- [31] Girardin FR, Gex-Fabry M, Berney P, Shah D, Gaspoz JM, Dayer P. Drug-induced long QT in adult psychiatric inpatients: the 5-year cross-sectional ECG Screening Outcome in Psychiatry study. *Am J Psychiatry* 2013;170:1468-1476.
- [32] Glassman AH. Clinical management of cardiovascular risks during treatment with psychotropic drugs. *J Clin Psychiatry* 2002;63 Suppl 9:12-17.
- [33] Glassman AH, Bigger JT, Jr. Antipsychotic drugs: prolonged QTc interval, torsade de pointes, and sudden death. *Am J Psychiatry* 2001;158:1774-1782.
- [34] Greco KE, Tune LE, Brown FW, Van Horn WA. A retrospective study of the safety of intramuscular ziprasidone in agitated elderly patients. *J Clin Psychiatry* 2005;66:928-929.
- [35] Groleau G, Jotte R, Barish R. The electrocardiographic manifestations of cyclic antidepressant therapy and overdose: a review. *J Emerg Med* 1990;8:597-605.
- [36] Haas SJ, Hill R, Krum H, Liew D, Tonkin A, Demos L et al. Clozapine-associated myocarditis: a review of 116 cases of suspected myocarditis associated with the use of clozapine in Australia during 1993-2003. *Drug Saf* 2007;30:47-57.
- [37] Haddad PM, Sharma SG. Adverse effects of atypical antipsychotics : differential risk and clinical implications. *CNS Drugs* 2007;21:911-936.
- [38] Hale AS. A review of the safety and tolerability of sertindole. *Int Clin Psychopharmacol* 1998;13 Suppl 3:S65-70.

- [39] Hasnain M, Vieweg WV. QTc interval prolongation and torsade de pointes associated with second-generation antipsychotics and antidepressants: a comprehensive review. *CNS Drugs* 2014;28:887-920.
- [40] Hasnain M, Vieweg WV, Howland RH, Kogut C, Breden Crouse EL, Koneru JN et al. Quetiapine and the need for a thorough QT/QTc study. *J Clin Psychopharmacol* 2014;34:3-6.
- [41] Hays JT. Tobacco dependence treatment in patients with heart and lung disease: implications for intervention and review of pharmacological therapy. *J Cardiopulm Rehabil* 2000;20:215-223.
- [42] Herrmann N, Lanctot KL. Atypical antipsychotics for neuropsychiatric symptoms of dementia: malignant or maligned? *Drug Saf* 2006;29:833-843.
- [43] Ho JM, Gomes T, Straus SE, Austin PC, Mamdani M, Juurlink DN. Adverse cardiac events in older patients receiving venlafaxine: a population-based study. *J Clin Psychiatry* 2014;75:e552-8.
- [44] Howland RH. Psychiatric medications and sudden cardiac death: putting the risk in perspective. *J Psychosoc Nurs Ment Health Serv* 2015;53:23-25.
- [45] Howland RH. The comparative cardiac effects of haloperidol and quetiapine: parsing a review. *J Psychosoc Nurs Ment Health Serv* 2014;52:23-26.
- [46] Joy JP, Coulter CV, Duffull SB, Isbister GK. Prediction of torsade de pointes from the QT interval: analysis of a case series of amisulpride overdoses. *Clin Pharmacol Ther* 2011;90:243-245.
- [47] Kao LW, Kirk MA, Evers SJ, Rosenfeld SH. Droperidol, QT prolongation, and sudden death: what is the evidence? *Ann Emerg Med* 2003;41:546-558.
- [48] Karamatskos E, Lambert M, Mulert C, Naber D. Drug safety and efficacy evaluation of sertindole for schizophrenia. *Expert Opin Drug Saf* 2012;11:1047-1062.
- [49] Kelly DL, Love RC. Ziprasidone and the QTc interval: pharmacokinetic and pharmacodynamic considerations. *Psychopharmacol Bull* 2001;35:66-79.
- [50] Kireyev D, Arkhipov MV, Zador ST, Paris JA, Boden WE. Clinical utility of aVR-The neglected electrocardiographic lead. *Ann Noninvasive Electrocardiol* 2010;15:175-180.
- [51] Koegelenberg CF, Joubert ZJ, Irusen EM. Tricyclic antidepressant overdose necessitating ICU admission. *S Afr Med J* 2012;102:293-294.
- [52] Koenig X, Hilber K. The anti-addiction drug ibogaine and the heart: a delicate relation. *Molecules* 2015;20:2208-2228.
- [53] Koponen H, Alaraisanen A, Saari K, Pelkonen O, Huikuri H, Raatikainen MJ et al. Schizophrenia and sudden cardiac death: a review. *Nord J Psychiatry* 2008;62:342-345.
- [54] Kovacs D, Arora R. Cardiovascular effects of psychotropic drugs. *Am J Ther* 2008;15:474-483.
- [55] Kurth J, Maguire G. Pediatric case report of quetiapine overdose and QTc prolongation. *Ann Clin Psychiatry* 2004;16:229-231.
- [56] Lange-Asschenfeldt C, Lederbogen F. Antidepressant therapy in coronary artery disease. *Nervenarzt* 2011;82:657-64; quiz 665-6.
- [57] Laursen TM, Munk-Olsen T, Vestergaard M. Life expectancy and cardiovascular mortality in persons with schizophrenia. *Curr Opin Psychiatry* 2012;25:83-88.
- [58] Lindstrom E, Farde L, Eberhard J, Haverkamp W. QTc interval prolongation and antipsychotic drug treatments: focus on sertindole. *Int J Neuropsychopharmacol* 2005;8:615-629.
- [59] Lopponen P, Tetri S, Juvela S, Huhtakangas J, Saloheimo P, Bode MK et al. Association between warfarin combined with serotonin-modulating antidepressants and increased case fatality in primary intracerebral hemorrhage: a population-based study. *J Neurosurg* 2014;120:1358-1363.
- [60] Mackin P. Cardiac side effects of psychiatric drugs. *Hum Psychopharmacol* 2008;23 Suppl 1:3-14.

- [61] Maldonado JR. Delirium in the acute care setting: characteristics, diagnosis and treatment. *Crit Care Clin* 2008;24:657-722, vii.
- [62] Marder SR, Essock SM, Miller AL, Buchanan RW, Casey DE, Davis JM et al. Physical health monitoring of patients with schizophrenia. *Am J Psychiatry* 2004;161:1334-1349.
- [63] Menkes DB, Knight JC. Cardiotoxicity and prescription of thioridazine in New Zealand. *Aust N Z J Psychiatry* 2002;36:492-498.
- [64] Merrill DB, Dec GW, Goff DC. Adverse cardiac effects associated with clozapine. *J Clin Psychopharmacol* 2005;25:32-41.
- [65] Meyer-Massetti C, Cheng CM, Sharpe BA, Meier CR, Guglielmo BJ. The FDA extended warning for intravenous haloperidol and torsades de pointes: how should institutions respond? *J Hosp Med* 2010;5:E8-16.
- [66] Meyer-Massetti C, Vaerini S, Ratz Bravo AE, Meier CR, Guglielmo BJ. Comparative safety of antipsychotics in the WHO pharmacovigilance database: the haloperidol case. *Int J Clin Pharm* 2011;33:806-814.
- [67] Mittal V, Kurup L, Williamson D, Muralee S, Tampi RR. Risk of cerebrovascular adverse events and death in elderly patients with dementia when treated with antipsychotic medications: a literature review of evidence. *Am J Alzheimers Dis Other Demen* 2011;26:10-28.
- [68] Mohr WK, Petti TA, Mohr BD. Adverse effects associated with physical restraint. *Can J Psychiatry* 2003;48:330-337.
- [69] Neuhut R, Lindenmayer JP, Silva R. Neuroleptic malignant syndrome in children and adolescents on atypical antipsychotic medication: a review. *J Child Adolesc Psychopharmacol* 2009;19:415-422.
- [70] Olgun H, Yildirim ZK, Karacan M, Ceviz N. Clinical, electrocardiographic, and laboratory findings in children with amitriptyline intoxication. *Pediatr Emerg Care* 2009;25:170-173.
- [71] Peter L, Dome P, Rihmer Z, Kovacs G, Faludi G. Cardiovascular disorders and depression: a review of epidemiological and possible etiological data. *Neuropsychopharmacol Hung* 2008;10:81-90.
- [72] Pizzi C, Rutjes AW, Costa GM, Fontana F, Mezzetti A, Manzoli L. Meta-analysis of selective serotonin reuptake inhibitors in patients with depression and coronary heart disease. *Am J Cardiol* 2011;107:972-979.
- [73] Postema PG, Wolpert C, Amin AS, Probst V, Borggreffe M, Roden DM et al. Drugs and Brugada syndrome patients: review of the literature, recommendations, and an up-to-date website ([www.brugadadrugs.org](http://www.brugadadrugs.org)). *Heart Rhythm* 2009;6:1335-1341.
- [74] Rabkin SW. Impact of Age and Sex on QT Prolongation in Patients Receiving Psychotropics. *Can J Psychiatry* 2015;60:206-214.
- [75] Raedler TJ. Cardiovascular aspects of antipsychotics. *Curr Opin Psychiatry* 2010;23:574-581.
- [76] Reingardiene D, Vilcinskaite J. QTc-prolonging drugs and the risk of sudden death. *Medicina (Kaunas)* 2007;43:347-353.
- [77] Richards JR, Schneir AB. Droperidol in the emergency department: is it safe? *J Emerg Med* 2003;24:441-447.
- [78] Sala M, Lazzaretti M, De Vidovich G, Caverzasi E, Barale F, d'Allio G et al. Electrophysiological changes of cardiac function during antidepressant treatment. *Ther Adv Cardiovasc Dis* 2009;3:29-43.
- [79] Saravane D, Feve B, Frances Y, Corruble E, Lancon C, Chanson P et al. Drawing up guidelines for the attendance of physical health of patients with severe mental illness. *Encephale* 2009;35:330-339.
- [80] Sicouri S, Antzelevitch C. Sudden cardiac death secondary to antidepressant and antipsychotic drugs. *Expert Opin Drug Saf* 2008;7:181-194.

- [81] Singh N, Singh HK, Khan IA. Serial electrocardiographic changes as a predictor of cardiovascular toxicity in acute tricyclic antidepressant overdose. *Am J Ther* 2002;9:75-79.
- [82] Smithburger PL, Seybert AL, Armahizer MJ, Kane-Gill SL. QT prolongation in the intensive care unit: commonly used medications and the impact of drug-drug interactions. *Expert Opin Drug Saf* 2010;9:699-712.
- [83] Straus SM, Bleumink GS, Dieleman JP, van der Lei J, 't Jong GW, Kingma JH et al. Antipsychotics and the risk of sudden cardiac death. *Arch Intern Med* 2004;164:1293-1297.
- [84] Tamargo J. Drug-induced torsade de pointes: from molecular biology to bedside. *Jpn J Pharmacol* 2000;83:1-19.
- [85] Taylor DM. Antipsychotics and QT prolongation. *Acta Psychiatr Scand* 2003;107:85-95.
- [86] Titier K, Canal M, Deridet E, Abouelfath A, Gromb S, Molimard M et al. Determination of myocardium to plasma concentration ratios of five antipsychotic drugs: comparison with their ability to induce arrhythmia and sudden death in clinical practice. *Toxicol Appl Pharmacol* 2004;199:52-60.
- [87] Vieweg WV. Mechanisms and risks of electrocardiographic QT interval prolongation when using antipsychotic drugs. *J Clin Psychiatry* 2002;63 Suppl 9:18-24.
- [88] Vieweg WV, Hasnain M, Hancox JC, Baranchuk A, Digby GC, Kogut C et al. Risperidone, QTc interval prolongation, and torsade de pointes: a systematic review of case reports. *Psychopharmacology (Berl)* 2013;228:515-524.
- [89] Vieweg WV, Hasnain M, Howland RH, Hetteema JM, Kogut C, Wood MA et al. Citalopram, QTc interval prolongation, and torsade de pointes. How should we apply the recent FDA ruling? *Am J Med* 2012;125:859-868.
- [90] Vieweg WV, Wood MA, Fernandez A, Beatty-Brooks M, Hasnain M, Pandurangi AK. Proarrhythmic risk with antipsychotic and antidepressant drugs: implications in the elderly. *Drugs Aging* 2009;26:997-1012.
- [91] Viskin S, Justo D, Halkin A, Zeltser D. Long QT syndrome caused by noncardiac drugs. *Prog Cardiovasc Dis* 2003;45:415-427.
- [92] Waring WS, Good AM, Bateman DN. Lack of significant toxicity after mirtazapine overdose: a five-year review of cases admitted to a regional toxicology unit. *Clin Toxicol (Phila)* 2007;45:45-50.
- [93] Warner B, Hoffmann P. Investigation of the potential of clozapine to cause torsade de pointes. *Adverse Drug React Toxicol Rev* 2002;21:189-203.
- [94] Wilens TE, Biederman J, Baldessarini RJ, Geller B, Schleifer D, Spencer TJ et al. Cardiovascular effects of therapeutic doses of tricyclic antidepressants in children and adolescents. *J Am Acad Child Adolesc Psychiatry* 1996;35:1491-1501.
- [95] Wilens TE, Stern TA, O'Gara PT. Adverse cardiac effects of combined neuroleptic ingestion and tricyclic antidepressant overdose. *J Clin Psychopharmacol* 1990;10:51-54.
- [96] Wobrock T, Schwaab B, Bohm M, Schafers HJ, Wanke K, Supprian T. Pharmacotherapeutical approaches to insomnia patients with cardiac diseases and after heart transplantation. *Z Kardiol* 2001;90:717-728.
- [97] Xue F, Strombom I, Turnbull B, Zhu S, Seeger J. Treatment with duloxetine in adults and the incidence of cardiovascular events. *J Clin Psychopharmacol* 2012;32:23-30.
- [98] Zeltser D, Justo D, Halkin A, Prokhorov V, Heller K, Viskin S. Torsade de pointes due to noncardiac drugs: most patients have easily identifiable risk factors. *Medicine (Baltimore)* 2003;82:282-290.
- [99] Zemrak WR, Kenna GA. Association of antipsychotic and antidepressant drugs with Q-T interval prolongation. *Am J Health Syst Pharm* 2008;65:1029-1038.

[100] More evidence on risks of antipsychotics in adults. Commentaries provide advice about putting the results in perspective. *Harv Ment Health Lett* 2009;25:6.

*Electronic Supplementary Material to:*

*Limited evidence for Risk factors for proarrhythmia and sudden cardiac death in patients using antidepressants: Dutch consensus on ECG monitoring.*

### *Drug Safety*

*Mirjam, Simoons<sup>a,b,c\*</sup>, Adrie, Seldenrijk<sup>b,d\*</sup>, Hans, Mulder<sup>a,e</sup>, Tom, Birkenhäger<sup>f,g</sup>, Mascha, Groothedde-Kuyvenhoven<sup>h</sup>, Rob, Kok<sup>i</sup>, Cornelis, Kramers<sup>j</sup>, Wim, Verbeek<sup>k,l</sup>, Mirjam, Westra<sup>b</sup>, Eric van Roon<sup>c,m</sup>, Roberto, Bakker<sup>n,o#</sup>, Henricus, Ruhé<sup>b,p,q#</sup>*

<sup>a</sup> *Wilhelmina Hospital Assen, Department of Clinical Pharmacy, Assen, The Netherlands*

<sup>b</sup> *University of Groningen, University Medical Centre Groningen, Department of Psychiatry, Interdisciplinary Centre for Psychopathology and Emotion regulation, Groningen, The Netherlands*

<sup>c</sup> *University of Groningen, Department of Pharmacy, Unit of Pharmacotherapy, -Epidemiology & -Economics, Groningen, The Netherlands*

<sup>d</sup> *GGZ InGeest, Department of Research & Innovation, Amsterdam, The Netherlands*

<sup>e</sup> *Psychiatric Hospital GGZ Drenthe, Assen, The Netherlands*

<sup>f</sup> *Erasmus Medical Centre, Department of Psychiatry, Rotterdam, The Netherlands*

<sup>g</sup> *Collaborative Antwerp Psychiatric Research Institute (CAPRI), University of Antwerp, Belgium*

<sup>h</sup> *Deventer Hospital, Department of Clinical Pharmacy, Deventer, The Netherlands*

<sup>i</sup> *Parnassia Psychiatric Institute, Department of Old Age Psychiatry, The Hague, The Netherlands*

<sup>j</sup> *Radboudumc, Department of Internal Medicine, Nijmegen, The Netherlands*

<sup>k</sup> *Vincent van Gogh Institute for Psychiatry, ADHD and Autism Circuit, Venray, the Netherlands*

<sup>l</sup> *Radboudumc, Department of Pharmacology and Toxicology, Nijmegen, The Netherlands*

<sup>m</sup> *Medical Centre Leeuwarden, Department of Clinical Pharmacy and Clinical Pharmacology, Leeuwarden, The Netherlands*

<sup>n</sup> *Psychiatric Centre GGz Centraal, Amersfoort, The Netherlands.*

<sup>o</sup> *Maastricht University Medical Centre, Department of Psychiatry and Psychology, South Limburg Mental Health and Teaching Network, Maastricht, The Netherlands.*

<sup>p</sup> *Warneford Hospital, University of Oxford, Department of Psychiatry, United Kingdom*

<sup>q</sup> *Radboudumc, Department of Psychiatry, Nijmegen, The Netherlands*

*\* These authors share first authorship*

*# These authors share senior authorship*

*Corresponding author: Henricus Ruhé, MD, PhD, e-mail: [h.q.ruhe@umcg.nl](mailto:h.q.ruhe@umcg.nl).*
